# Supplementary material for: Lignin-derived porous graphene for wearable and ultrasensitive strain sensors
Source: Royal Society of Chemistry journal article supplement (doi:10.1039/d2tc00953f), 2022-01-01
Supplement: d2tc00953f1.pdf [file d2tc00953f1.pdf]

## Supporting Information

### **Lignin-derived Porous Graphene for Wearable and Ultrasensitive Strain Sensors**

Shuhong Yang <sup>a</sup>, Yun Ling <sup>a</sup>, Qian Wu <sup>b</sup>, Hanwen Zhang <sup>a</sup>, Zheng Yan <sup>a,b</sup>, Guoliang Huang <sup>b</sup>,

Jian Lin <sup>b</sup>, Caixia Wan <sup>a,\*</sup>

<sup>a</sup> Department of Biomedical, Biological, and Chemical Engineering, University of Missouri,

Columbia 65211, USA

<sup>b</sup> Department of Mechanical and Aerospace Engineering, University of Missouri, Columbia

65211, USA

\*Corresponding author: Phone: +1 573 884 7882; Fax: +1 573 884 5650; E-mail:

[wanca@missouri.edu](mailto:wanca@missouri.edu)

Number of Pages: 12

Number of Tables: 2

Number of Figures: 7

### Calculation of gauge factor and hysteresis

Gauge factor (GF) was calculated by Equation S1:

$$GF = \frac{(R-R_0)/R_0}{\varepsilon} \quad (S1)$$

Where  $R$  is resistance,  $R_0$  is original resistance,  $\varepsilon$  is strain calculated based on relative length change ( $\Delta L$ ) divided by original length ( $L$ ).

Hysteresis was calculated by Equation S2:

$$h\% = \left| \frac{R_s - R_r}{R_{max}} \right| \times 100\% \quad (S2)$$

Where  $R_s$ ,  $R_r$ , and  $R_{max}$  are the stretching, releasing, and maximum values of resistance at a given strain, respectively.

**Table S1. Sheet resistance of LIG from various precursors**

| <b>Precursor for LIG</b> | <b>Rs (<math>\Omega</math>/square) *</b> | <b>Reference</b> |
|--------------------------|------------------------------------------|------------------|
| Lignin                   | 4.5                                      | This work        |
| Wood                     | ~10                                      | 1                |
| Cellulose paper          | 32                                       | 2                |
| Polyimide                | ~17                                      | 3                |
| Polyetherimide           | ~15                                      | 4                |
| Phenolic resin           | ~40                                      | 5                |

\* Lowest sheet resistance (Rs) obtained for comparison.

**Table S2. Performance comparisons of state-of-art strain sensors**

| Sensing materials                                | Working Range              | Gauge factor          | Limits of strain detection | Hysteresis            | Tested Stability | Reference |
|--------------------------------------------------|----------------------------|-----------------------|----------------------------|-----------------------|------------------|-----------|
| Lignin-derived LIG/<br>Dragon Skin <sup>TM</sup> | 9%-14%<br>4%~9%<br>0.1%~4% | 960<br>166<br>100     | 0.1%                       | 7% at <9% strain      | 10,000           | This work |
| Paper-derived LIG                                | 0.2%~1%                    | 41.9                  | ~0.2%                      | Not shown             | ~2,500           | 2         |
| LIG derived from lignin-<br>PDMS                 | 65%                        | 20                    | Not shown                  | 3% at <60% strain     | 5,000            | 6         |
| PI-derived LIG                                   | <1.5%                      | 26                    | Not shown                  | Not shown             | 20,000           | 7         |
| PI-derived LIG/PDMS<br>composite                 | <30%                       | 160                   | Not shown                  | Not shown             | 200              | 8         |
| PI-LIG/Kapton tape                               | <3.3%                      | 0.47                  | Not shown                  | Not shown             | 1,300            | 9         |
| Graphene oxide/PDMS                              | <2%<br>2%~5%<br>5%~7.5%    | 34.3<br>99.9<br>402.3 | Not shown                  | Not shown             | Not shown        | 10        |
| CVD-grown graphene/PDMS                          | 0.3%~4.5%                  | 151                   | 0.3%                       | Not shown             | Not shown        | 11        |
| Graphene woven<br>fabrics/PDMS                   | <2%<br>2%~6%               | 35<br>1000            | Not shown                  | Not shown             | 100              | 12        |
| CNT-based conductive paper                       | 0.1%~0.7%                  | 2.6-7.5               | 0.1%                       | Not shown             | 1,000            | 13        |
| CVD-based carbon nanotube/<br>Ecoflex            | 0.1%~80%<br>80%~145%       | 256<br>3250           | 0.1%                       | ~50%* at <140% strain | 1,000            | 14        |
| CNT/PDMS                                         | <40%<br>40%~280%           | 0.8<br>0.06           | Not shown                  | ~72%* at <200% strain | 10,000           | 15        |
| Silver nano wire composites/<br>PDMS             | <70%                       | 14                    | Not shown                  | 25%~66%*              | 1,000            | 16        |
| Nanowire/PDMS                                    | <1.08%                     | 35.8                  | Not shown                  | <8.1%                 | ~1,200           | 17        |

\* Values estimated from publications.

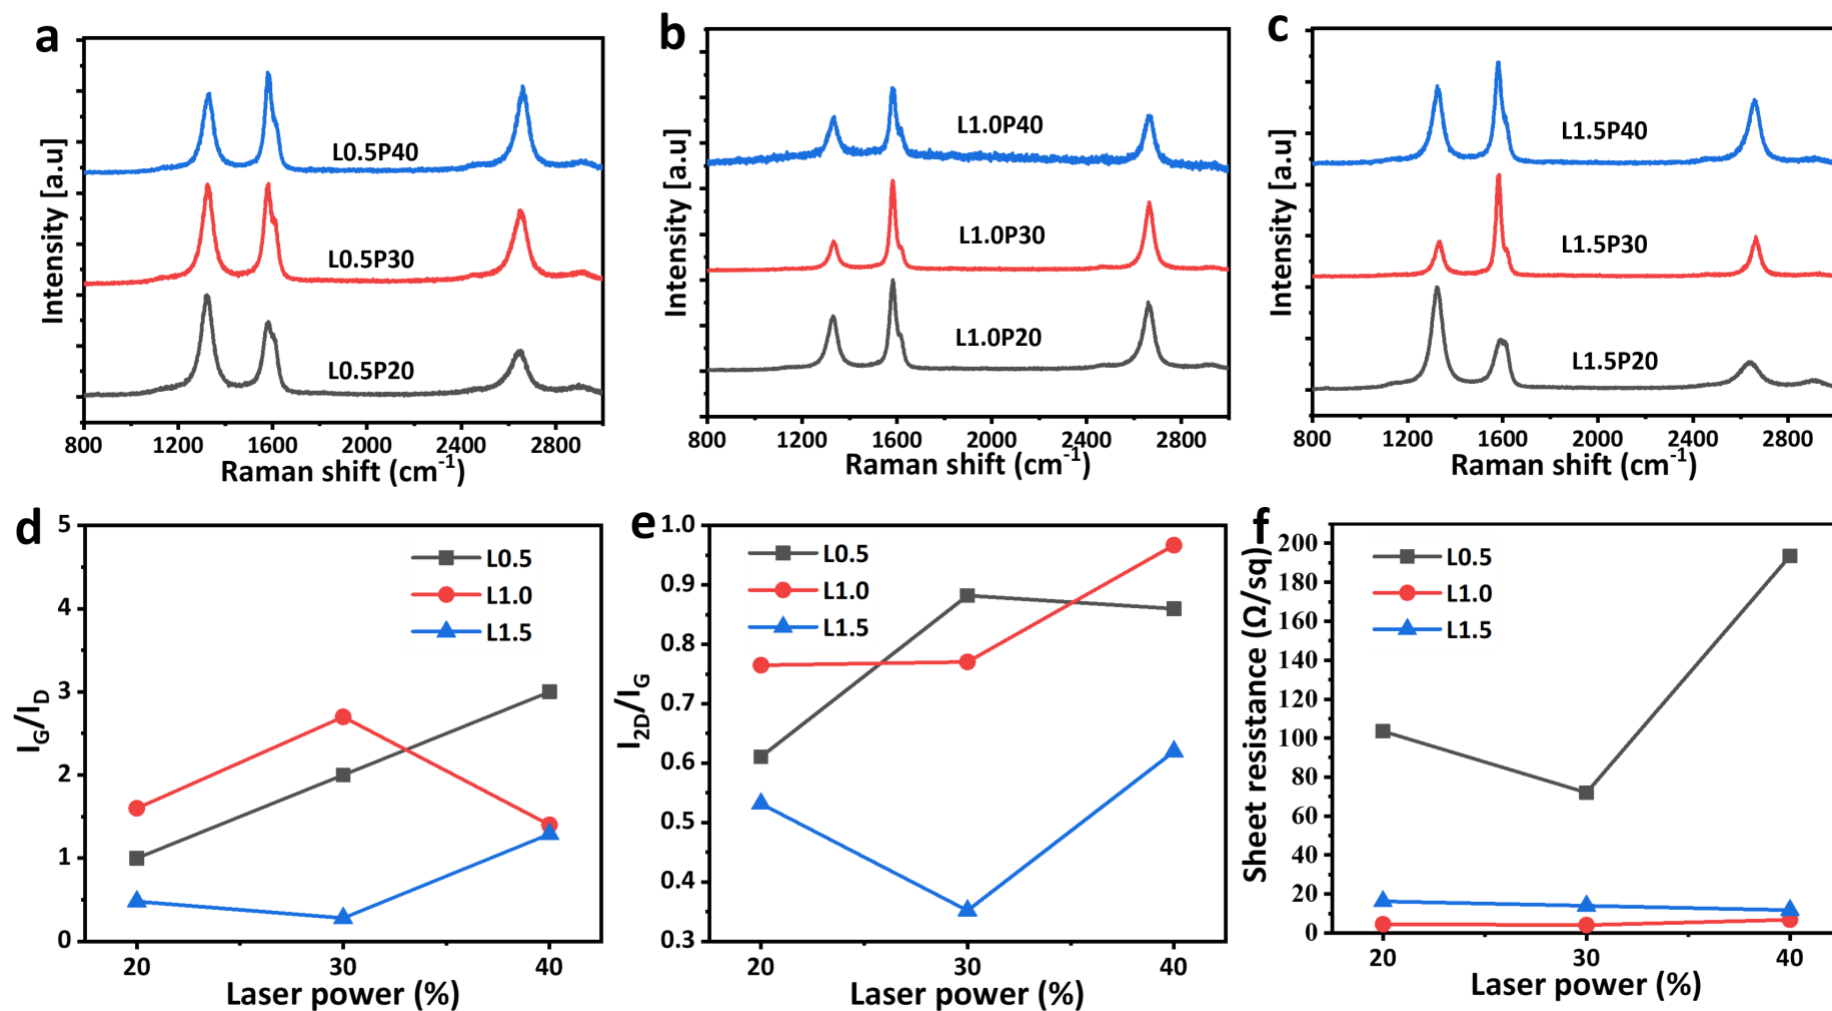

**Fig. S1.** Characteristics of LIG. (a-c) Raman spectra. (d, e)  $I_G/I_D$  and  $I_{2D}/I_G$ , respectively. (f) Sheet resistance. L0.5, L1.0, and L1.5 stand for respective lignin loadings in the three films. P20, P30, and P40 stand for 20%, 30%, and 40% power level, respectively.

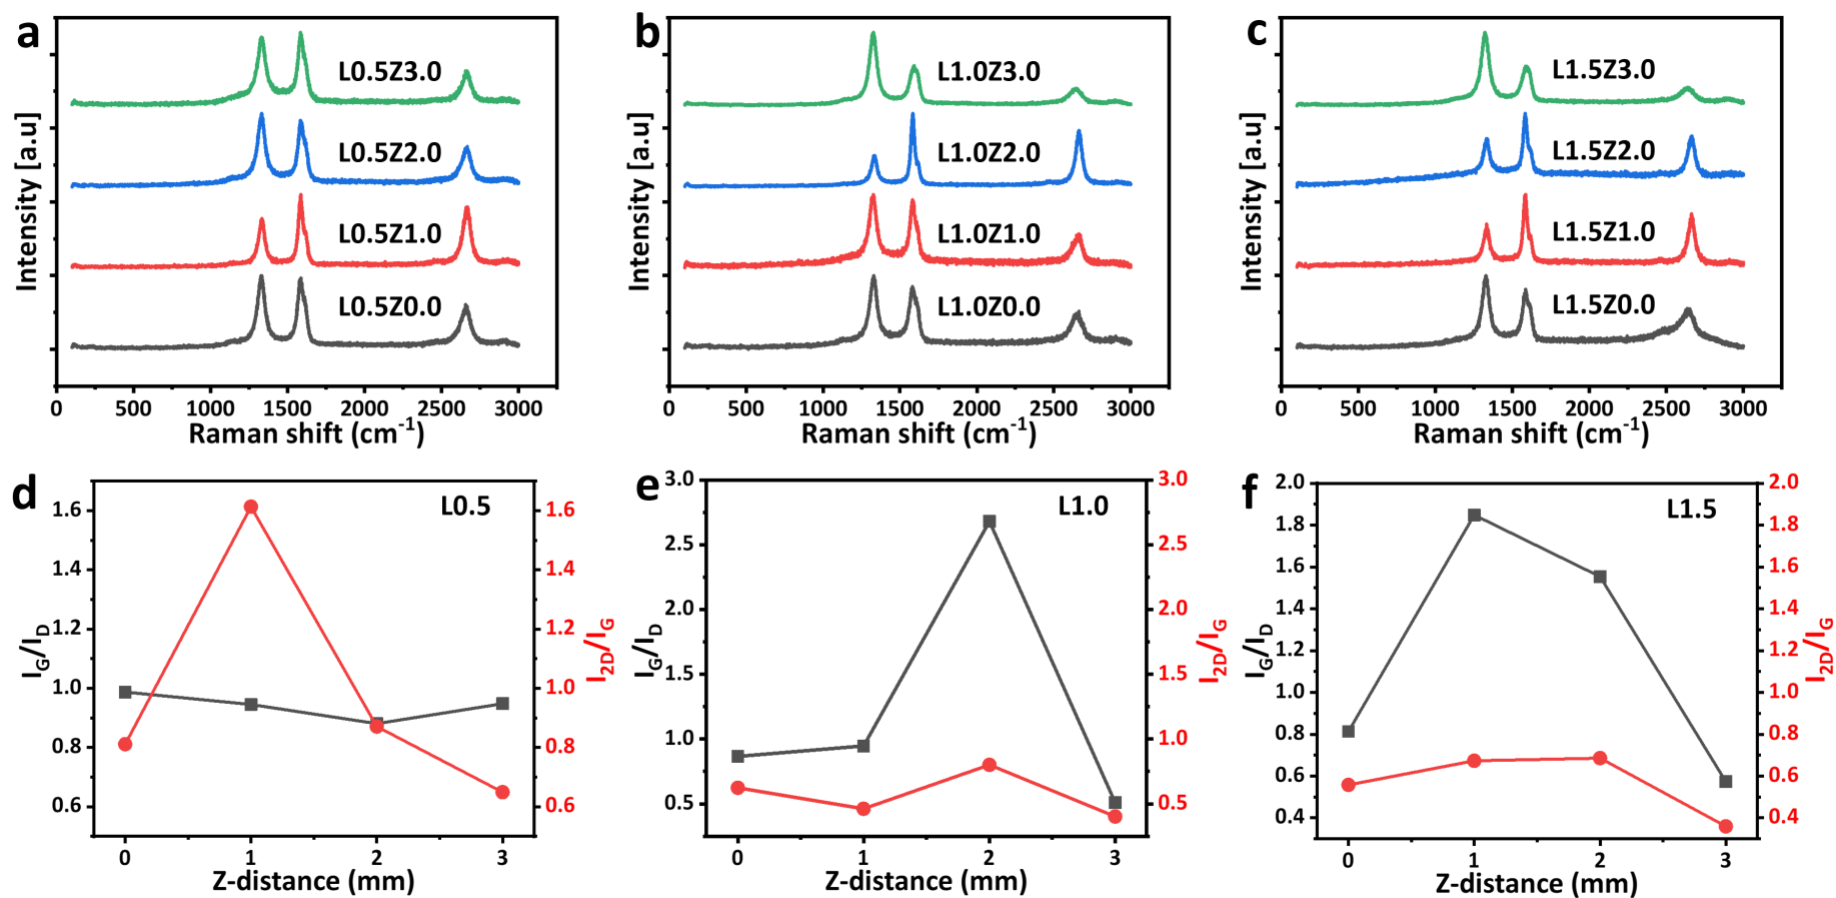

**Fig. S2.** Characteristics of LIG. (a-c) Raman spectra. (d-f)  $I_G/I_D$  and  $I_{2D}/I_G$ . L0.5, L1.0, and L1.5 stand for respective lignin loadings in the three films. Z0.0, Z1.0, Z2.0 and Z3.0 stand for 0.0-, 1.0-, 2.0-, and 3.0-mm z-axis defocus distance, respectively. All the LIG samples were obtained at 30% laser power.

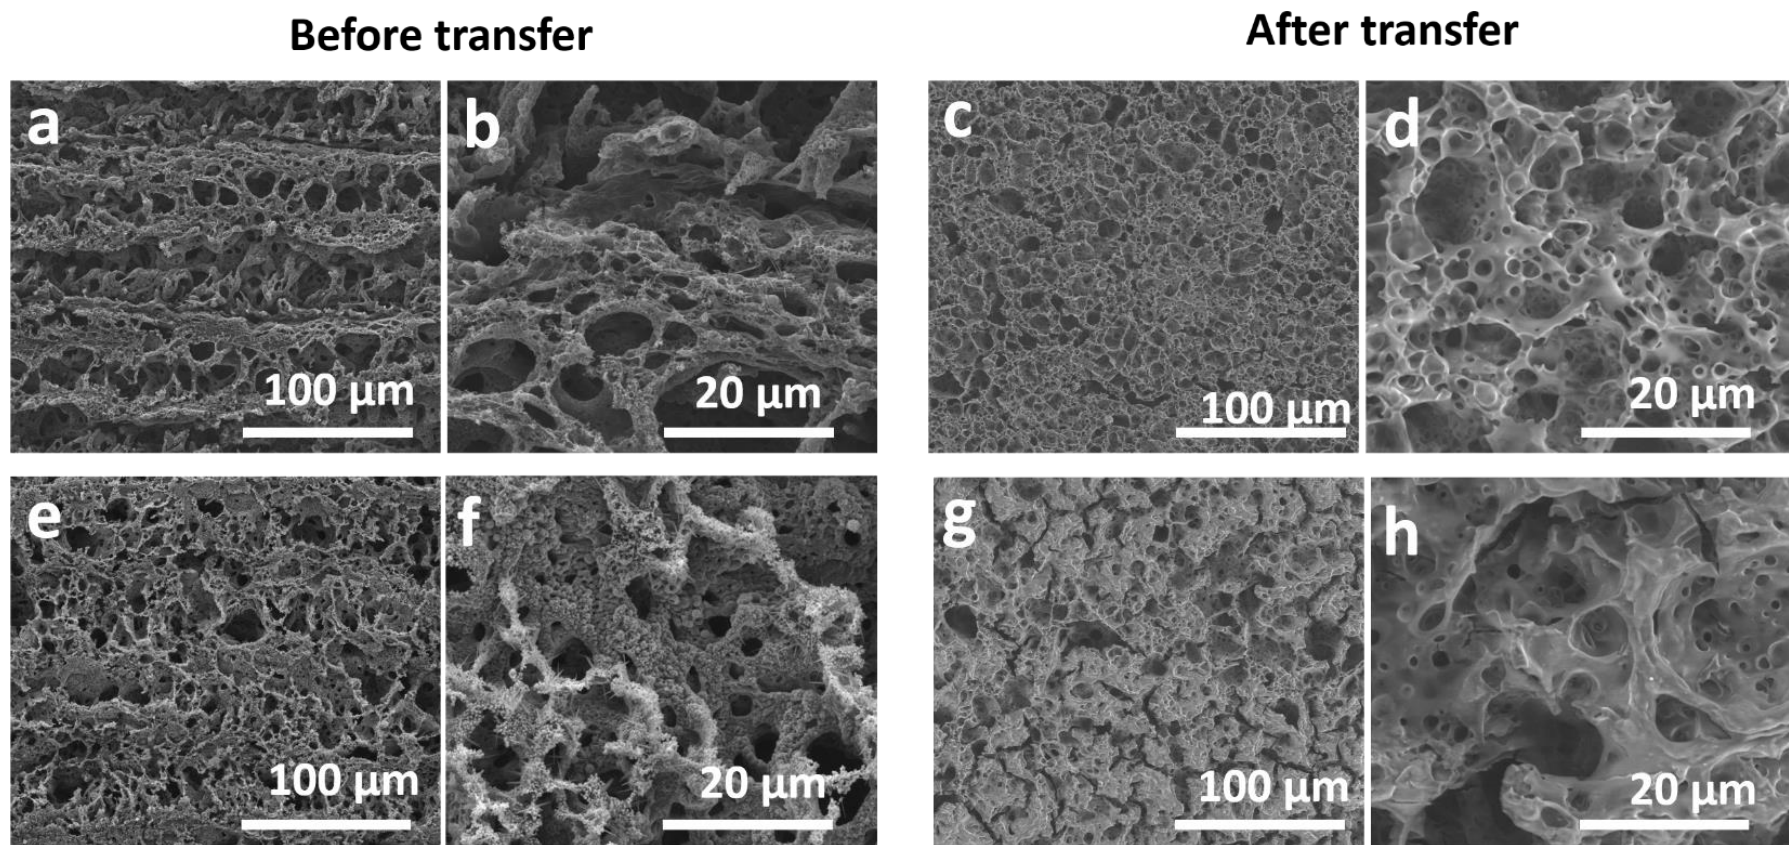

**Fig. S3.** SEM images of LIG samples. (a-b) L1.0P20 before transfer; (c-d) L1.0P20 after transfer. (e-f) L1.0P40 before transfer; (g-h) L1.0P40 after transfer. Scale bar: 100  $\mu\text{m}$  (a, c, e, g), and 20  $\mu\text{m}$  (b, d, f, h).

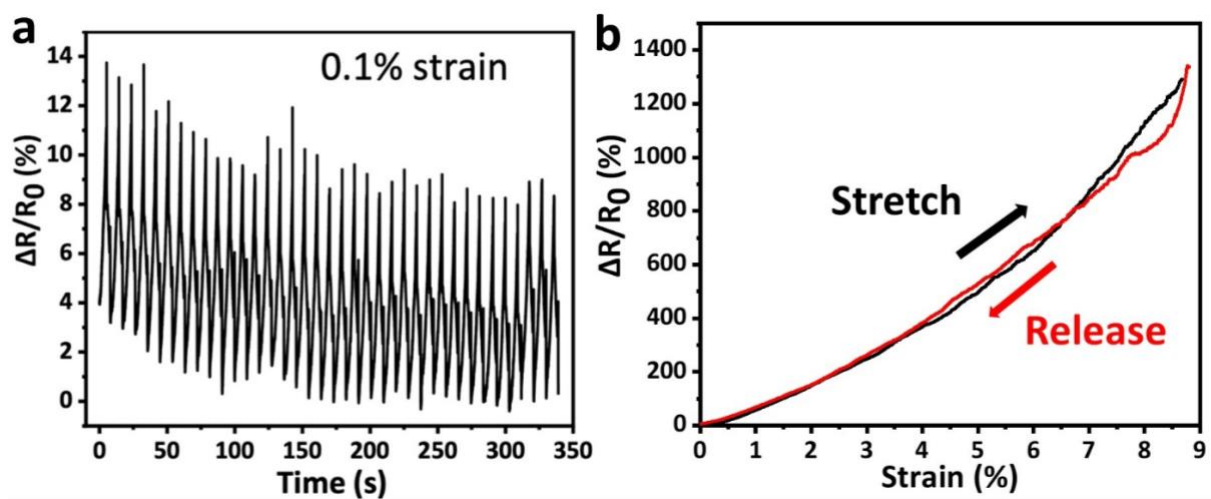

**Fig. S4.** (a) Strain sensor working at 0.1% strain for about 40 stretch-release cycles. (b)  $\Delta R/R_0$  when stretched (black line) and released (red line) at 9% strain.



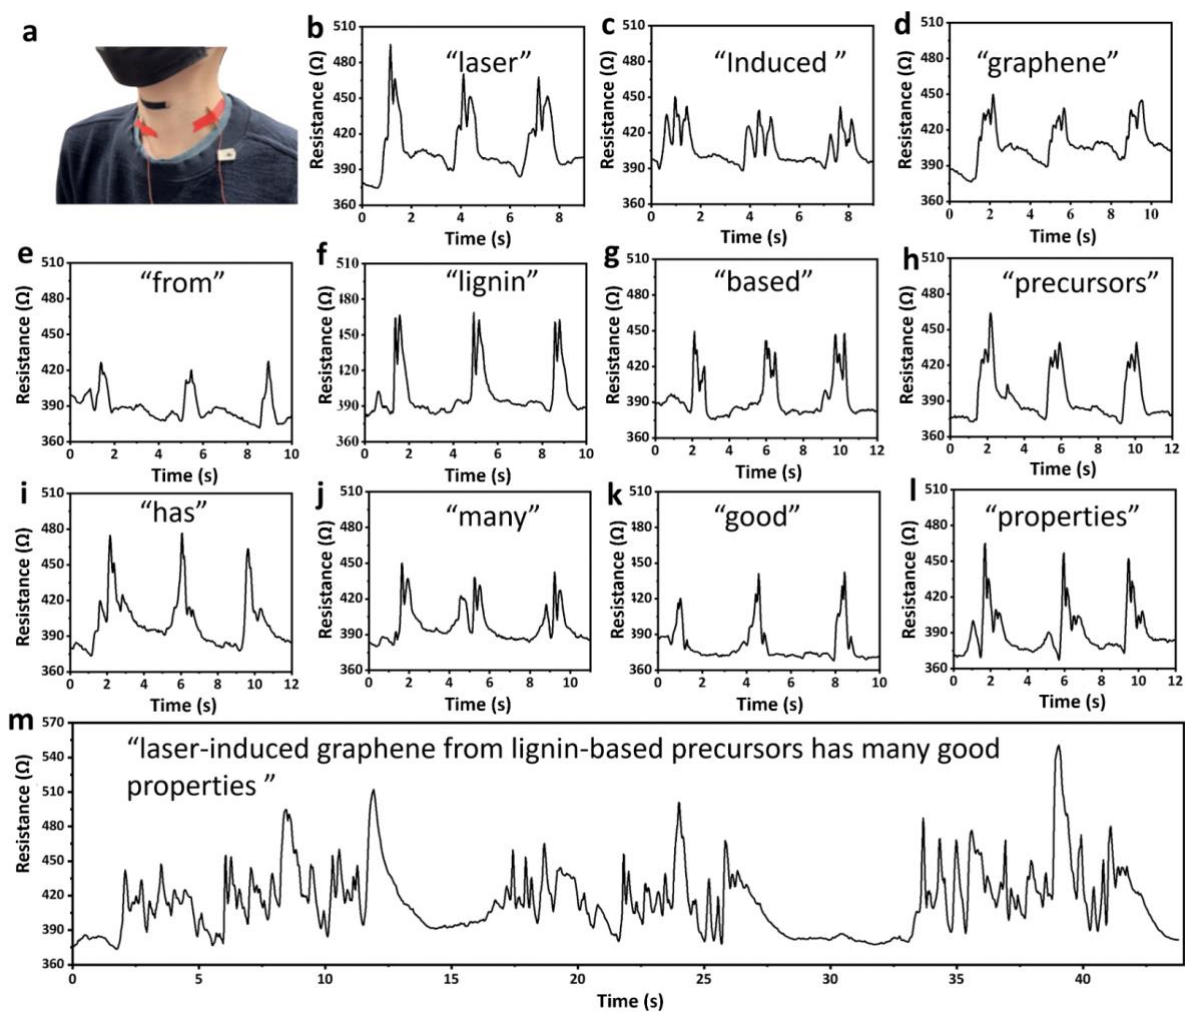

**Fig. S5.** Strain sensor working as a speaking detector. (a) Photo of attaching the sensor to one's throat. Signal patterns when one speaks (b-i) individual words and (m) a whole sentence three times.

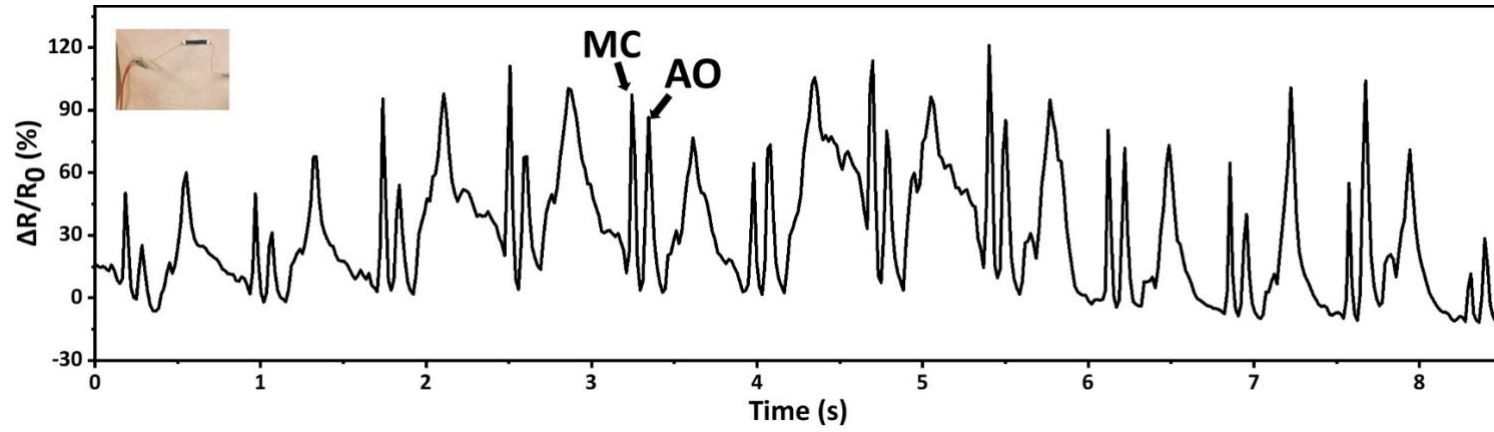

**Fig. S6.**  $\Delta R/R_0$  of seismocardiography detected at lower chest (shown in the photo) when one's breath is being held.

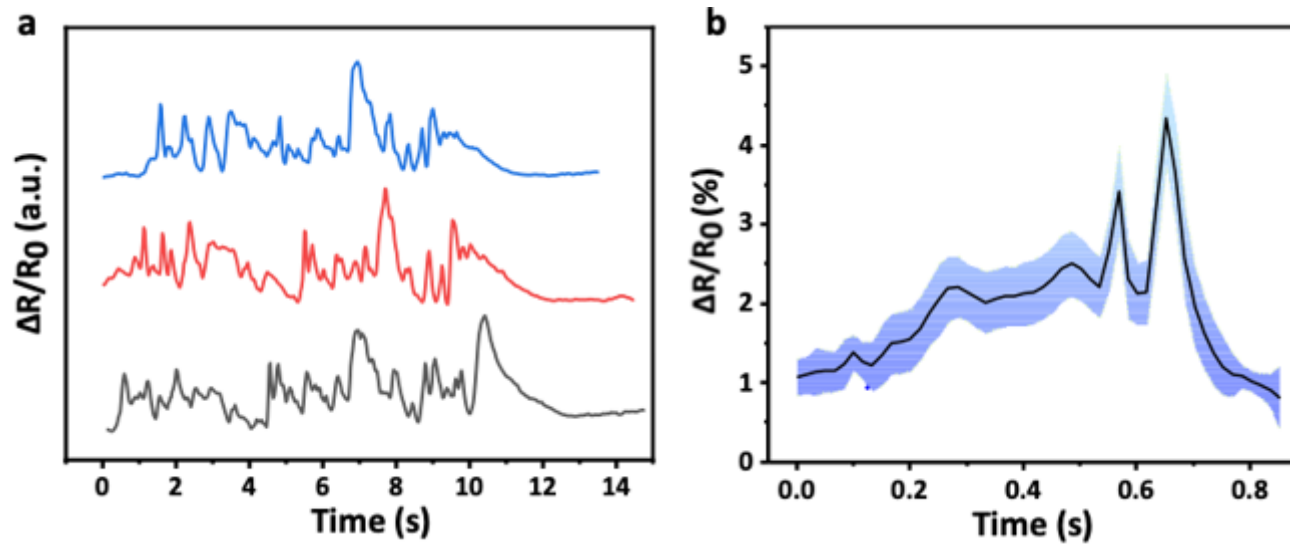

**Fig. S7.** Signal analysis of speaking and seismocardiography. (a) Comparison of speaking signals presented in Fig.S5m in parallel. (b) Mean and standard deviation of seismocardiographic signals.

## References

1. R. Ye, Y. Chyan, J. Zhang, Y. Li, X. Han, C. Kittrell and J.M. Tour, Laser-induced graphene formation on wood, *Adv. Mater.*, 2017, **29**(37), 170221.
2. B. Kulyk, B.F.R. Silva, A.F. Carvalho, S. Silvestre, A.J.S. Fernandes, R. Martins, E. Fortunato and F.M. Costa, Laser-induced graphene from paper for mechanical sensing, *ACS Appl. Mater. Interfaces*, 2021, **13**(8), 10210-10221.
3. J. Lin, Z. Peng, Y. Liu, F. Ruiz-Zepeda, R. Ye, E.L. Samuel, M.J. Yacaman, B.I. Yakobson and J.M. Tour, Laser-induced porous graphene films from commercial polymers, *Nat. Commun.*, 2014, **5**, 5714.
4. A. Al-Rahayfeh and M. Faezipour, Eye tracking and head movement detection: a state-of-art survey, *IEEE J. Transl. Eng. Health Med.*, 2013, **1**, 2100212.
5. Z.C. Zhang, M.M. Song, J.X. Hao, K.B. Wu, C.Y. Li and C.G. Hu, Visible light laser-induced graphene from phenolic resin: a new approach for directly writing graphene-based electrochemical devices on various substrates, *Carbon*, 2018, **127**, 287-296.
6. C.W. Lee, S.Y. Jeong, Y.W. Kwon, J.U. Lee, S.C. Cho and B.S. Shin, Fabrication of laser-induced graphene-based multifunctional sensing platform for sweat ion and human motion monitoring, *Sens. Actuator A Phys.*, 2022, **334**, 113320.
7. A.F. Carvalho, A.J.S. Fernandes, C. Leitão, J. Deuermeier, A.C. Marques, R. Martins, E. Fortunato and F.M. Costa, Laser-induced graphene strain sensors produced by ultraviolet irradiation of polyimide, *Adv. Funct. Mater.*, 2018, **28**(52), 1805271.
8. S.Y. Jeong, Y.W. Ma, J.U. Lee, G.J. Je and B.S. Shin, Flexible and highly sensitive strain sensor based on laser-induced graphene pattern fabricated by 355 nm pulsed laser, *Sensors (Basel)*, 2019, **19**(22), 4867.
9. T. Han, A. Nag, R.B.V.B. Simorangkir, N. Afsarimanesh, H.R. Liu, S.C. Mukhopadhyay, Y.Z. Xu, M. Zhadobov and R. Sauleau, Multifunctional flexible sensor based on laser-induced graphene, *Sensors*, 2019, **19**, 3477.
10. D.Y. Wang, L.Q. Tao, Y. Liu, T.Y. Zhang, Y. Pang, Q. Wang, S. Jiang, Y. Yang and T.L. Ren, High performance flexible strain sensor based on self-locked overlapping graphene sheets, *Nanoscale*, 2016, **8**(48), 20090-20095.
11. X.W. Fu, Z.M. Liao, J.X. Zhou, Y.B. Zhou, H.C. Wu, R. Zhang, G.Y. Jing, J. Xu, X.S. Wu, W.L. Guo and D.P. Yu, Strain dependent resistance in chemical vapor deposition grown graphene, *Appl. Phys. Lett.*, 2011, **99**(21), 213107.
12. X. Li, R.J. Zhang, W.J. Yu, K.L. Wang, J.Q. Wei, D.H. Wu, A.Y. Cao, Z.H. Li, Y. Cheng, Q.S. Zheng, R.S. Ruoff and H.W. Zhu, Stretchable and highly sensitive graphene-on-polymer strain sensors, *Sci. Rep.*, 2012, **2**, 870.
13. Q.M. Li, H. Liu, S.D. Zhang, D.B. Zhang, X.H. Liu, Y.X. He, L.W. Mi, J.X. Zhang, C.T. Liu, C.Y. Shen and Z.H. Guo, Superhydrophobic electrically conductive paper for ultrasensitive strain sensor with excellent anticorrosion and self-cleaning property, *ACS Appl. Mater. Interfaces*, 2019, **11**(24), 21904-21914.
14. J. Lee, S. Pyo, D.S. Kwon, E. Jo, W. Kim and J. Kim, Ultrasensitive strain sensor based on separation of overlapped carbon nanotubes, *Small*, 2019, **15**(12), 21904-21914.
15. T. Yamada, Y. Hayamizu, Y. Yamamoto, Y. Yomogida, A. Izadi-Najafabadi, D.N. Futaba and K. Hata, A stretchable carbon nanotube strain sensor for human-motion detection, *Nat. Nanotechnol.*, 2011, **6**(5), 296-301.
16. M. Amjadi, A. Pichitpajongkit, S. Lee, S. Ryu and I. Park, Highly stretchable and sensitive strain sensor based on silver nanowire-elastomer nanocomposite, *ACS Nano*, 2014, **8**(5), 5154-5163.

17. N. Tang, C. Zhou, D.Y. Qu, Y. Fang, Y.B. Zheng, W.W. Hu, K. Jin, W.W. Wu, X.X. Duan and H. Haick, A highly aligned nanowire-based strain sensor for ultrasensitive monitoring of subtle human motion, *Small*, 2020, **16**(24), 2001363.
